# Supplementary material
Source: publisher site journal article supplement (https://www.e-cmh.org/upload/media/cmh-2023-0422-Supplementary-Table-2.pdf)
Supplement: Supplementary file 1 [file cmh-2023-0422-Supplementary-Table-2.pdf]

**Supplementary Table 2.** Summary of imputation rules for quantitative viral markers for efficacy analysis

| Test    | LLOQ       | LOD   | Original value                 | Imputed value                      | Unit                        |
|---------|------------|-------|--------------------------------|------------------------------------|-----------------------------|
| HBV DNA | 20         | -     | "<20" or "Target not detected" | 19                                 | IU/mL                       |
|         | 10 (China) | -     | "<10" or "Target not detected" | 9                                  |                             |
| HBeAg   | 0.3        | -     | Numeric: <0.3                  | 0.29                               | IU/mL                       |
|         |            |       | Character: "<0.14"             | 0.13                               |                             |
| HBV RNA | 1          | 0.699 | Character:<br>"<"              | 0.99                               | Log <sub>10</sub> copies/mL |
|         |            |       | "TND"                          | 0.69                               |                             |
|         | 10         | 10    | Character:<br>"<10"            | 0.99 (log <sub>10</sub> copies/mL) | copies/mL                   |
|         |            |       | "TND"                          |                                    |                             |
| HBcrAg  | 3          | 2.6   | Numeric:<br><2.6               | 2.5                                | Log <sub>10</sub> U/mL      |
|         |            |       | 2.6-<3.0                       | 2.9                                |                             |
|         |            |       | Character:<br>"<2.0"           | 1.9                                |                             |
|         |            |       |                                |                                    |                             |

HBcrAg, hepatitis core-related antigen; HBV DNA, hepatitis B virus DNA; HBV RNA, hepatitis B virus RNA; LLOQ, lower limit of quantification; LOD, limit of detection; TND, target not detected.
